# Supplementary material
Source: publisher site journal article supplement (https://www.spandidos-publications.com/8171/downloadSupplementary)
Supplement: Supplementary file 1 [file downloadSupplementary]

## Sheet: hbonds-details
Table SIII. Hydrogen bond analysis between OG and HAS2 from molecular dynamics simulations.
Donor	Acceptor	Occupancy
LIG553-Side	ALA90-Main	0.0022
LIG553-Side	ALA91-Main	0.0003
LIG553-Side	TYR92-Main	0.0074
LIG553-Side	ASP214-Side	0.0659
LYS190-Side	LIG553-Side	0.0891
LIG553-Side	ASP121-Side	1.101
LIG553-Side	ASP212-Side	0.0814
LIG553-Side	GLU94-Side	0.0277
ARG468-Main	LIG553-Side	0.0038
LIG553-Side	GLN93-Main	0.0001
ARG468-Side	LIG553-Side	0.0323
GLY467-Main	LIG553-Side	0.0051
TYR92-Side	LIG553-Side	0.0032
LIG553-Side	SER213-Side	0.0024
LIG553-Side	THR465-Side	0.0443
ASP212-Side	LIG553-Side	0.0003
ALA90-Side	LIG553-Side	0.0001
LYS190-Main	LIG553-Side	0.0071
VAL193-Side	LIG553-Side	0.0008
LIG553-Side	GLY467-Main	0.0137
LIG553-Side	SER466-Main	0.1007
LIG553-Side	ARG468-Side	0.0033
THR465-Side	LIG553-Side	0.0343
LIG553-Side	THR465-Main	0.002
GLY189-Main	LIG553-Side	0.0301
GLY467-Main	LIG553-Main	0.0006
LIG553-Side	ARG468-Main	0.0041
ARG353-Side	LIG553-Side	0.0028
ARG468-Side	LIG553-Main	0.0025
LIG553-Side	SER466-Side	0.0029
LIG553-Main	THR465-Side	0.0013
LIG553-Side	ARG353-Side	0.0002
SER466-Main	LIG553-Side	0.0317
LIG553-Main	SER466-Main	0.0005
TYR92-Main	LIG553-Side	0.0083
ALA91-Main	LIG553-Side	0.0003
LIG553-Side	TYR92-Side	0.0044
TRP187-Side	LIG553-Side	0.0005
LIG553-Side	TRP187-Side	0.0007
PHE311-Side	LIG553-Side	0.005
GLN350-Side	LIG553-Side	0.001
LIG553-Side	SER310-Side	0.0328
PHE311-Main	LIG553-Side	0.3295
LIG553-Side	ASP313-Side	1.376
LIG553-Side	PHE311-Main	0.0025
LIG553-Side	PHE311-Side	0.0546
GLY312-Main	LIG553-Side	0.0137
LIG553-Side	GLY464-Main	0.0014
SER466-Side	LIG553-Side	0.005
LIG553-Main	SER310-Side	0.0002
TRP463-Side	LIG553-Side	0.0005
LIG553-Side	TRP463-Side	0.0001
THR465-Main	LIG553-Side	0.0034
LIG553-Main	PHE311-Side	0.0001
SER310-Main	LIG553-Side	0.0055
SER310-Side	LIG553-Side	0.069
LIG553-Side	CYS309-Main	0.0012
THR465-Side	LIG553-Main	0.0252
LIG553-Main	ASP313-Side	0.0011
ASP313-Main	LIG553-Side	0.0104
ASP313-Side	LIG553-Side	0.0004
LIG553-Side	GLN350-Side	0.0002
ARG468-Main	LIG553-Main	0.0002
ARG191-Side	LIG553-Side	0.0002
GLN302-Side	LIG553-Side	0.0001
LIG553-Main	LYS190-Side	0.0001
